# Supplementary material
Source: Springer Nature journal article supplement (https://www.springermedizin.de/resource/supplementary/12905_2013_411_MOESM2_ESM.pdf/9518716)

# Reported Reasons for Resorting to Abortion

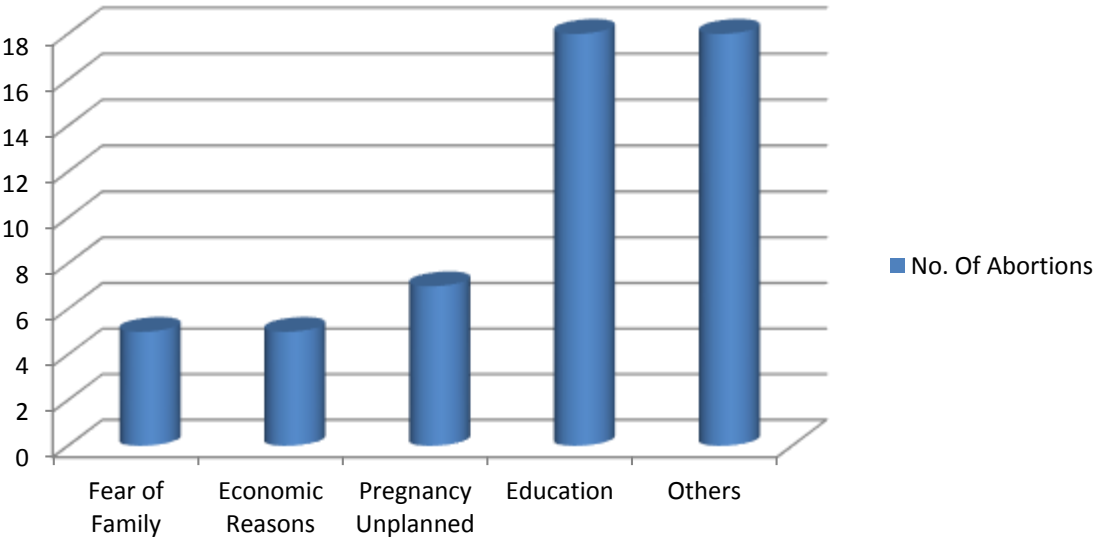

Supplement: MOESM2 [file 9518716]
